# Supplementary material
Source: ML conference proceedings conference paper supplement (https://proceedings.neurips.cc/paper_files/paper/2019/hash/a70145bf8b173e4496b554ce57969e24-Abstract.html)
Supplement: Supplementary file [file a70145bf8b173e4496b554ce57969e24-Supplemental.zip]

## A Supplementary Materials

### A.1 Proofs for Section 3

#### A.1.1 Proof of Theorem 2

*Proof.* The proof is along the lines of Corollary 3.8 in [18]. Fix a sample of data  $\mathcal{S}_n = (\mathbb{X}, \mathbb{C}) \in (\mathcal{X}, \mathcal{C})^n$ , where  $\mathbb{X} = (x_1, \dots, x_n)$  and  $\mathbb{C} = (c_1, \dots, c_n)$ . Let  $\mathfrak{F}_{|\mathbb{X}|} := \{(w^*(f(x_1)), \dots, w^*(f(x_n))) : f \in \mathcal{H}\}$ . From the definition of empirical Rademacher complexity, we have that

$$\begin{aligned} \hat{\mathfrak{R}}_{\text{SPO}}^n(\mathcal{H}) &= \mathbb{E}_\sigma \left[ \sup_{f \in \mathcal{H}} \frac{1}{n} \sum_{i=1}^n \sigma_i \ell_{\text{SPO}}(f(x_i), c_i) \right] \\ &= \mathbb{E}_\sigma \left[ \sup_{f \in \mathcal{H}} \frac{1}{n} \sum_{i=1}^n \sigma_i c_i^T (w^*(f(x_i)) - w^*(c_i)) \right] \\ &= \mathbb{E}_\sigma \left[ \sup_{(w_1, \dots, w_n) \in \mathfrak{F}_{|\mathbb{X}|}} \frac{1}{n} \sum_{i=1}^n \sigma_i c_i^T (w_i - w^*(c_i)) \right] \\ &\leq \omega_S(\mathcal{C}) \sqrt{\frac{2 \log |\mathfrak{F}_{|\mathbb{X}|}|}{n}} \\ &\leq \omega_S(\mathcal{C}) \sqrt{\frac{2 d_N(w^*(\mathcal{H})) \log(n|\mathfrak{S}|^2)}{n}} \end{aligned}$$

where the first inequality is directly due to Massart's lemma and the definition of  $\omega_S(\mathcal{C})$  and the second inequality follows from the Natarajan Lemma (see Lemma 29.4 in [20]). The bound for the expected version of the Rademacher complexity follows immediately from the bound on the empirical Rademacher complexity. Applying this bound with Theorem 1 concludes the proof.  $\square$

#### A.1.2 Proof of Corollary 1

*Proof.* We will prove that  $w^*(\mathcal{H}_{\text{lin}})$  is an instance of a linear multiclass predictor for a particular class-sensitive feature mapping  $\Psi$ . Recall that  $|\mathfrak{S}|$  is the number of extreme points of  $S$ . In our application of linear multiclass predictors, let  $\Psi : \mathcal{X} \times \{1, \dots, |\mathfrak{S}|\} \mapsto \mathbb{R}^{d \times p}$  be a function that takes a feature vector an extreme point and maps it to a matrix and let

$$\mathcal{H}_\Psi = \{x \mapsto \operatorname{argmax}_{i \in \{1, \dots, |\mathfrak{S}|\}} \langle B, \Psi(x, i) \rangle : B \in \mathbb{R}^{d \times p}\}.$$

We will show that, for  $\Psi(x, i) = w_i x^T$ , we have that  $w^*(\mathcal{H}_{\text{lin}}) \subseteq \mathcal{H}_\Psi$ . Consider any  $f \in \mathcal{H}_{\text{lin}}$  and the associated matrix  $B_f$ . Then

$$\begin{aligned} w^*(B_f x) &\in \operatorname{argmin}_{w \in S} (B_f x)^T w \\ &= \operatorname{argmax}_{i \in \{1, \dots, |\mathfrak{S}|\}} - (B_f x)^T w_i \\ &= \operatorname{argmax}_{i \in \{1, \dots, |\mathfrak{S}|\}} - \operatorname{Tr}((B_f x)^T w_i) \\ &= \operatorname{argmax}_{i \in \{1, \dots, |\mathfrak{S}|\}} - \operatorname{Tr}(B_f^T w_i x^T) \\ &= \operatorname{argmax}_{i \in \{1, \dots, |\mathfrak{S}|\}} \langle -B_f, w_i x^T \rangle. \end{aligned}$$

Thus, it is clear that for  $\Psi(x, i) = w_i x^T$ , choosing the function in  $\mathcal{H}_\Psi$  corresponding to  $-B_f$  yields exactly the function  $f$ . Therefore  $w^*(\mathcal{H}_{\text{lin}}) \subseteq \mathcal{H}_\Psi$ . Theorem 7 in [5] shows that  $d_N(\mathcal{H}_\Psi) \leq dp$ . Since  $w^*(\mathcal{H}_{\text{lin}}) \subseteq \mathcal{H}_\Psi$ , then  $d_N(w^*(\mathcal{H}_{\text{lin}})) \leq dp$ . Combining this bound on the Natarajan dimension with Theorem 2 concludes the proof.  $\square$

### A.1.3 Proof of Corollary 2

*Proof.* Consider the smallest cardinality  $\epsilon$ -covering of the feasible region  $S$  by Euclidean balls of radius  $\epsilon$ . From Example 27.1 in [20], the number of balls needed is at most  $\left(\frac{2\rho_2(S)\sqrt{d}}{\epsilon}\right)^d$ . Let the set  $\tilde{\mathcal{S}}$  denote the centers of the balls from the smallest cardinality covering. Then it immediately follows that

$$|\tilde{\mathcal{S}}| \leq \left(\frac{2\rho_2(S)\sqrt{d}}{\epsilon}\right)^d. \quad (8)$$

Finally, let the function  $\tilde{w} : S \mapsto \{1, \dots, |\tilde{\mathcal{S}}|\}$  be the function that takes a feasible solution in  $S$  and maps it to the closest point in  $\tilde{\mathcal{S}}$ .

We can bound the empirical Rademacher complexity by

$$\begin{aligned} \hat{\mathfrak{R}}_{\text{SPO}}^n(\mathcal{H}) &= \mathbb{E}_\sigma \left[ \sup_{f \in \mathcal{H}} \frac{1}{n} \sum_{i=1}^n \sigma_i \ell_{\text{SPO}}(f(x_i), c_i) \right] \\ &= \mathbb{E}_\sigma \left[ \sup_{f \in \mathcal{H}} \frac{1}{n} \sum_{i=1}^n \sigma_i c_i^T (w^*(f(x_i)) - w^*(c_i)) \right] \\ &= \mathbb{E}_\sigma \left[ \sup_{f \in \mathcal{H}} \frac{1}{n} \sum_{i=1}^n \sigma_i c_i^T [w^*(f(x_i)) - \tilde{w}(w^*(f(x_i))) + \tilde{w}(w^*(f(x_i))) - w^*(c_i)] \right] \\ &\leq \mathbb{E}_\sigma \left[ \sup_{f \in \mathcal{H}} \frac{1}{n} \sum_{i=1}^n \sigma_i c_i^T [w^*(f(x_i)) - \tilde{w}(w^*(f(x_i)))] \right] + \mathbb{E}_\sigma \left[ \sup_{f \in \mathcal{H}} \frac{1}{n} \sum_{i=1}^n \sigma_i c_i^T [\tilde{w}(w^*(f(x_i))) - w^*(c_i)] \right] \\ &\leq 2\epsilon\rho_2(\mathcal{C}) + \mathbb{E}_\sigma \left[ \sup_{f \in \mathcal{H}} \frac{1}{n} \sum_{i=1}^n \sigma_i c_i^T [\tilde{w}(w^*(f(x_i))) - w^*(c_i)] \right] \\ &\leq 2\epsilon\rho_2(\mathcal{C}) + (\omega_S(\mathcal{C}) + 2\epsilon\rho_2(\mathcal{C})) \sqrt{\frac{2d_N(\tilde{w}(w^*(\mathcal{H}))) \log(n|\tilde{\mathcal{S}}|^2)}{n}} \end{aligned} \quad (9)$$

The first inequality follows from the triangle inequality. The second inequality follows from the fact that  $w^*(f(x_i))$  and  $\tilde{w}(w^*(f(x_i)))$  are at most  $2\epsilon$  away by the definition of  $\tilde{w}$ . In the worst case, the difference is in the direction of  $c_i$ , and  $c_i^T [w^*(f(x_i)) - \tilde{w}(w^*(f(x_i)))] \leq 2\|c_i\| \leq \rho_2(\mathcal{C})$ . The third inequality follows from the same exact argument as that in Theorem 2, with the additional observation that the maximum value of  $c_i^T [\tilde{w}(w^*(f(x_i))) - w^*(c_i)]$  is  $\omega_S(\mathcal{C}) + 2\epsilon\rho_2(\mathcal{C})$  using a similar reasoning as in the second inequality. Thus, all that remains is to bound  $d_N(\tilde{w}(w^*(\mathcal{H})))$ . To do this, we first observe that  $d_N(w^*(\mathcal{H})) \leq dp$ , where the proof follows exactly that of Corollary 1 but we now have an infinite number of labels, i.e., each point in  $S$ . Finally, we observe that

$$d_N(\tilde{w}(w^*(\mathcal{H}))) \leq d_N(w^*(\mathcal{H})) \leq dp \quad (10)$$

since  $\tilde{w}$  is simply a deterministic function, and thus the number of dichotomies (labelings) that can be generated by  $\tilde{w}(w^*(\mathcal{H}))$  is at most that of  $w^*(\mathcal{H})$ .

Now setting  $\epsilon = \frac{1}{n}$ , and combining Eq. (8), Eq. (9), and Eq. (10) yields

$$\begin{aligned} \hat{\mathfrak{R}}_{\text{SPO}}^n(\mathcal{H}) &\leq \frac{2\rho_2(\mathcal{C})}{n} \left( 1 + \sqrt{\frac{2dp \log(n(2n\rho_2(S)\sqrt{d})^{2d})}{n}} \right) + \omega_S(\mathcal{C}) \sqrt{\frac{2dp \log(n(2n\rho_2(S)\sqrt{d})^{2d})}{n}} \\ &\leq \frac{2\rho_2(\mathcal{C})}{n} \left( 1 + 2d\sqrt{\frac{2p \log(2n\rho_2(S)d)}{n}} \right) + 2d\omega_S(\mathcal{C}) \sqrt{\frac{2p \log(2n\rho_2(S)d)}{n}}. \end{aligned} \quad (11)$$

Finally, combining Eq. (11) with Theorem 2 yields

$$R_{\text{SPO}}(f) \leq \hat{R}_{\text{SPO}}(f) + 4d\omega_S(\mathcal{C}) \sqrt{\frac{2p \log(2n\rho_2(S)d)}{n}} + 3\omega_S(\mathcal{C}) \sqrt{\frac{\log(2/\delta)}{2n}} + O\left(\frac{1}{n}\right).$$

□

## A.2 Proofs for Section 4

### A.2.1 Proof of Proposition 1

*Proof.* The well-known optimality condition for differentiable convex optimization problems (see Proposition 1.1.8 of [2]) states that  $\bar{w} \in S$  is an optimal solution of (3) if and only if:

$$\nabla F(\bar{w})^T(w - \bar{w}) \geq 0 \text{ for all } w \in S. \quad (12)$$

Let us now demonstrate that the conditions (4) and (12) are equivalent when  $S$  is  $\mu$ -strongly convex.

Clearly, (4) implies (12). Now suppose that (12) holds and let  $w \in S$  be arbitrary. Define  $\hat{w}(\lambda) := \lambda w + (1 - \lambda)\bar{w}$  and  $r(\lambda) := (\frac{\mu}{2}) \lambda(1 - \lambda) \|w - \bar{w}\|^2$  for  $\lambda \in [0, 1]$ . By the  $\mu$ -strong convexity of  $S$ , we have that  $B(\hat{w}(\lambda), r(\lambda)) \subseteq S$ . Hence, applying (12) inside  $B(\hat{w}(\lambda), r(\lambda))$  yields:

$$\nabla F(\bar{w})^T(\tilde{w} - \bar{w}) \geq 0 \text{ for all } \tilde{w} \in B(\hat{w}(\lambda), r(\lambda)).$$

Clearly the above condition is equivalent to:

$$-\nabla F(\bar{w})^T \bar{w} \geq \max_{\tilde{w} \in B(\hat{w}(\lambda), r(\lambda))} \{-\nabla F(\bar{w})^T \tilde{w}\} = -\nabla F(\bar{w})^T \hat{w}(\lambda) + r(\lambda) \|\nabla F(\bar{w})\|_*,$$

where the equality above follows from the definition of the dual norm  $\|\cdot\|_*$ . Rearranging the above and using  $\hat{w}(\lambda) - \bar{w} = \lambda(w - \bar{w})$  as well as the definition of  $r(\lambda)$  yields:

$$\lambda \nabla F(\bar{w})^T(w - \bar{w}) \geq \left(\frac{\mu}{2}\right) \lambda(1 - \lambda) \|\nabla F(\bar{w})\|_* \|w - \bar{w}\|^2 \text{ for all } \lambda \in [0, 1].$$

Now suppose that  $\lambda > 0$ . Dividing the above by  $\lambda$  yields:

$$\nabla F(\bar{w})^T(w - \bar{w}) \geq \left(\frac{\mu}{2}\right) (1 - \lambda) \|\nabla F(\bar{w})\|_* \|w - \bar{w}\|^2 \text{ for all } \lambda \in (0, 1].$$

Taking the limit as  $\lambda \rightarrow 0$  yields (4).  $\square$

### A.2.2 Proof of Theorem 3

In this section, we complete the proof of Theorem 3 by demonstrating that (6) holds, i.e., that the  $\gamma$ -margin SPO loss is Lipschitz. Let us first present the following lemma that will be useful in proving (6). Recall that  $B_*(c, r) = \{\hat{c} : \|\hat{c} - c\|_* \leq r\}$  is the dual norm ball centered at  $c$  of radius  $r$ .

**Lemma 1.** *Consider the function  $h_\gamma(\cdot, c) : B_*(0, \gamma) \rightarrow \mathbb{R}$  defined by  $h_\gamma(\hat{c}, c) := \left(\frac{\|\hat{c}\|_*}{\gamma}\right) \ell_{\text{SPO}}(\hat{c}, c)$  for all  $\hat{c} \in B_*(0, \gamma)$ . Then,  $h_\gamma(\cdot, c)$  is Lipschitz with respect to the dual norm  $\|\cdot\|_*$  with constant  $\frac{1}{\gamma} \left(\frac{\|c\|_*}{\mu} + \omega_S(c)\right) \leq \frac{3\|c\|_*}{\gamma\mu}$ .*

*Proof.* Let  $\hat{c}_1, \hat{c}_2 \in B_*(0, \gamma)$  be given. Note that if either  $\hat{c}_1 = 0$  or  $\hat{c}_2 = 0$ , then the result follows since  $\ell_{\text{SPO}}(\cdot, c) \leq \omega_S(c)$ . Now suppose without loss of generality that  $0 < \|\hat{c}_1\|_* \leq \|\hat{c}_2\|_*$ . Let  $\Delta := |h_\gamma(\hat{c}_1, c) - h_\gamma(\hat{c}_2, c)|$ . Then, we have that

$$\begin{aligned} \Delta &= \left| \left(\frac{\|\hat{c}_1\|_*}{\gamma}\right) \ell_{\text{SPO}}(\hat{c}_1, c) - \left(\frac{\|\hat{c}_2\|_*}{\gamma}\right) \ell_{\text{SPO}}(\hat{c}_2, c) \right| \\ &= \left| \left(\frac{\|\hat{c}_1\|_*}{\gamma}\right) \ell_{\text{SPO}}(\hat{c}_1, c) - \left(\frac{\|\hat{c}_1\|_*}{\gamma}\right) \ell_{\text{SPO}}(\hat{c}_2, c) + \left(\frac{\|\hat{c}_1\|_*}{\gamma}\right) \ell_{\text{SPO}}(\hat{c}_2, c) - \left(\frac{\|\hat{c}_2\|_*}{\gamma}\right) \ell_{\text{SPO}}(\hat{c}_2, c) \right| \\ &= \left| \left(\frac{\|\hat{c}_1\|_*}{\gamma}\right) [\ell_{\text{SPO}}(\hat{c}_1, c) - \ell_{\text{SPO}}(\hat{c}_2, c)] + \left(\frac{\ell_{\text{SPO}}(\hat{c}_2, c)}{\gamma}\right) [\|\hat{c}_1\|_* - \|\hat{c}_2\|_*] \right| \\ &\leq \left(\frac{\|\hat{c}_1\|_*}{\gamma}\right) \left(\frac{\|c\|_*}{\mu\|\hat{c}_1\|_*}\right) \|\hat{c}_1 - \hat{c}_2\|_* + \left(\frac{\omega_S(c)}{\gamma}\right) \|\hat{c}_1 - \hat{c}_2\|_* \\ &= \frac{1}{\gamma} \left(\frac{\|c\|_*}{\mu} + \omega_S(c)\right) \|\hat{c}_1 - \hat{c}_2\|_*, \end{aligned}$$

where the inequality above uses (5) and the reverse triangle inequality. Now we also claim that, due to the strong convexity of  $S$ , we have that  $\omega_S(c) \leq \frac{2\|c\|_*}{\mu}$ . When  $c = 0$ , this inequality is trivial.

Otherwise, let us apply (5) with  $\hat{c}_1 \leftarrow -c$  and  $\hat{c}_2 \leftarrow c$ , which yields:

$$\begin{aligned}\omega_S(c) &= \max_{w \in S} \{c^T w\} - \min_{w \in S} \{c^T w\} \\ &= c^T (w^*(\hat{c}_1) - w^*(\hat{c}_2)) \\ &\leq \|c\|_* \|w^*(\hat{c}_1) - w^*(\hat{c}_2)\| \\ &\leq \frac{2\|c\|_*^2}{\mu\|c\|_*} = \frac{2\|c\|_*}{\mu}.\end{aligned}$$

□

**Remainder of the proof of Theorem 3.** We are now ready to complete the proof of (6). Without loss of generality, we consider three cases: (i)  $\|\hat{c}_1\|_* \leq \gamma$  and  $\|\hat{c}_2\|_* \leq \gamma$ , (ii)  $\|\hat{c}_1\|_* > \gamma$  and  $\|\hat{c}_2\|_* > \gamma$ , and (iii)  $\|\hat{c}_1\|_* \leq \gamma$  and  $\|\hat{c}_2\|_* > \gamma$ .

Let us first consider case (i), i.e., we have that  $\hat{c}_1, \hat{c}_2 \in B_*(0, \gamma)$ . For any  $\hat{c} \in B_*(0, \gamma)$ , we have that

$$\ell_{\text{SPO}}^\gamma(\hat{c}, c) = \left(\frac{\|\hat{c}\|_*}{\gamma}\right) \ell_{\text{SPO}}(\hat{c}, c) + \left(1 - \frac{\|\hat{c}\|_*}{\gamma}\right) \omega_S(c).$$

Hence, on the ball  $B_*(0, \gamma)$ , the function  $\ell_{\text{SPO}}^\gamma(\cdot, c)$  decomposes as the sum of three functions. By Lemma 1, we have that the function in the first term of the right-hand side above is  $\frac{3\|c\|_*}{\gamma\mu}$ -Lipschitz on  $B_*(0, \gamma)$ . Clearly, the function in the second term is  $\frac{\omega_S(c)}{\gamma}$ -Lipschitz. Thus, using  $\omega_S(c) \leq \frac{2\|c\|_*}{\mu}$  and adding these two Lipschitz constants together yields the desired result for case (i).

Now, in case (ii), we have that  $\ell_{\text{SPO}}^\gamma(\hat{c}_1, c) = \ell_{\text{SPO}}(\hat{c}_1, c)$  and  $\ell_{\text{SPO}}^\gamma(\hat{c}_2, c) = \ell_{\text{SPO}}(\hat{c}_2, c)$ . Hence, (5) yields:

$$|\ell_{\text{SPO}}^\gamma(\hat{c}_1, c) - \ell_{\text{SPO}}^\gamma(\hat{c}_2, c)| = |c^T (w^*(\hat{c}_1) - w^*(\hat{c}_2))| \leq \|c\|_* \|w^*(\hat{c}_1) - w^*(\hat{c}_2)\| \leq \frac{\|c\|_*}{\gamma\mu} \|\hat{c}_1 - \hat{c}_2\|_*,$$

and clearly  $\frac{\|c\|_*}{\gamma\mu} \leq \frac{5\|c\|_*}{\gamma\mu}$ .

Finally, in case (iii), define  $\bar{c} := \lambda\hat{c}_1 + (1 - \lambda)\hat{c}_2$  where  $\lambda \in (0, 1]$  is such that  $\|\bar{c}\|_* = \gamma$ . Then, we have that:

$$\begin{aligned}|\ell_{\text{SPO}}^\gamma(\hat{c}_1, c) - \ell_{\text{SPO}}^\gamma(\hat{c}_2, c)| &= |(\ell_{\text{SPO}}^\gamma(\hat{c}_1, c) - \ell_{\text{SPO}}^\gamma(\bar{c}, c)) + (\ell_{\text{SPO}}^\gamma(\bar{c}, c) - \ell_{\text{SPO}}^\gamma(\hat{c}_2, c))| \\ &\leq |\ell_{\text{SPO}}^\gamma(\hat{c}_1, c) - \ell_{\text{SPO}}^\gamma(\bar{c}, c)| + |\ell_{\text{SPO}}^\gamma(\bar{c}, c) - \ell_{\text{SPO}}^\gamma(\hat{c}_2, c)| \\ &\leq \frac{5\|c\|_*}{\gamma\mu} \|\hat{c}_1 - \bar{c}\| + \frac{5\|c\|_*}{\gamma\mu} \|\bar{c} - \hat{c}_2\| \\ &= \frac{5\|c\|_*}{\gamma\mu} (\|\hat{c}_1 - \bar{c}\| + \|\bar{c} - \hat{c}_2\|) \\ &= \frac{5\|c\|_*}{\gamma\mu} \|\hat{c}_1 - \hat{c}_2\|,\end{aligned}$$

where the second inequality follows from cases (i) and (ii), and the final equality follows since  $\bar{c}$  lies on the line segment between  $\hat{c}_1$  and  $\hat{c}_2$ , i.e., we have that  $\|\hat{c}_1 - \bar{c}\| = (1 - \lambda)\|\hat{c}_1 - \hat{c}_2\|$  and  $\|\bar{c} - \hat{c}_2\| = \lambda\|\hat{c}_1 - \hat{c}_2\|$ . □

Finally, it is worth pointing out that the proofs of Lemma 1 and the remainder of the proof of Theorem 4 imply that the Lipschitz constant of  $\ell_{\text{SPO}}^\gamma$  can be improved slightly from  $\frac{5\|c\|_*}{\gamma\mu}$  to  $\frac{1}{\gamma} \left( \frac{\|c\|_*}{\mu} + 2\omega_S(c) \right)$ .

### A.2.3 Proof of Theorem 5

*Proof.* We prove the first inequality only; the second inequality can be proven in an identical manner.

The argument here follows closely the proof of Theorem 5.9 of [18]. Define  $\epsilon := \omega_S(\mathcal{C}) \sqrt{\frac{\log(2/\delta)}{2n}}$  and two sequences  $\{\gamma_k\}_{k=1}^\infty$  and  $\{\epsilon_k\}_{k=1}^\infty$  by

$$\epsilon_k := \epsilon + \omega_S(\mathcal{C}) \sqrt{\frac{\log(k)}{n}}, \text{ and } \gamma_k := \frac{\bar{\gamma}}{2^k}, \text{ for } k \geq 1.$$

Define the following events:

$$A_k := \left\{ \sup_{f \in \mathcal{H}} \left\{ R_{\text{SPO}}(f) - \hat{R}_{\text{SPO}}^{\gamma_k}(f) - \frac{10\sqrt{2}\rho_2(\mathcal{C})\mathfrak{R}^n(\mathcal{H})}{\gamma_k\mu} - \epsilon_k \right\} > 0 \right\} \text{ for } k \geq 1, \tilde{A} := \bigcup_{k=1}^{\infty} A_k, \text{ and}$$

$$\tilde{A} := \left\{ \sup_{f \in \mathcal{H}, \gamma \in (0, \bar{\gamma}]} \left\{ R_{\text{SPO}}(f) - \hat{R}_{\text{SPO}}^{\gamma}(f) - \frac{20\sqrt{2}\rho_2(\mathcal{C})\mathfrak{R}^n(\mathcal{H})}{\gamma\mu} - \omega_S(\mathcal{C})\sqrt{\frac{\log(\log_2(2\bar{\gamma}/\gamma))}{n}} - \epsilon \right\} > 0 \right\}.$$

Let us first argue that  $\tilde{A} \subseteq \tilde{A}$ . Indeed, suppose that  $\tilde{A}$  occurs. Then, there exists some  $f \in \mathcal{H}$  and some  $\gamma \in (0, \bar{\gamma}]$  such that:

$$R_{\text{SPO}}(f) - \hat{R}_{\text{SPO}}^{\gamma}(f) - \frac{20\sqrt{2}\rho_2(\mathcal{C})\mathfrak{R}^n(\mathcal{H})}{\gamma\mu} - \omega_S(\mathcal{C})\sqrt{\frac{\log(\log_2(2\bar{\gamma}/\gamma))}{n}} - \epsilon > 0. \quad (13)$$

By definition of the sequence  $\{\gamma_k\}$ , there exists  $k \geq 1$  such that  $\gamma_k \leq \gamma \leq 2\gamma_k$ . Thus,  $\gamma_k \leq \gamma$  implies that  $\hat{R}_{\text{SPO}}^{\gamma_k}(f) \leq \hat{R}_{\text{SPO}}^{\gamma}(f)$ . Moreover,  $\gamma \leq 2\gamma_k$  implies that  $-1/\gamma_k \geq -2/\gamma$ ,  $k \leq \log_2(2\bar{\gamma}/\gamma)$ , and thus

$$\epsilon_k = \epsilon + \omega_S(\mathcal{C})\sqrt{\frac{\log(k)}{n}} \leq \epsilon + \omega_S(\mathcal{C})\sqrt{\frac{\log(\log_2(2\bar{\gamma}/\gamma))}{n}}.$$

Now, combining the previous inequalities together with (13) yields:

$$R_{\text{SPO}}(f) - \hat{R}_{\text{SPO}}^{\gamma_k}(f) - \frac{10\sqrt{2}\rho_2(\mathcal{C})\mathfrak{R}^n(\mathcal{H})}{\gamma_k\mu} - \epsilon_k > 0,$$

which means that the event  $A_k$  and correspondingly the event  $\tilde{A}$  have occurred.

Now, for each  $k \geq 1$ , we apply Theorem 4 using  $\gamma \leftarrow \gamma_k$  and  $\delta \leftarrow \exp((-2n\epsilon_k^2)/\omega_S(\mathcal{C})^2)$ , which yields  $\mathbb{P}(A_k) \leq \exp((-2n\epsilon_k^2)/\omega_S(\mathcal{C})^2)$ . We now apply  $\mathbb{P}(\tilde{A}) \leq \mathbb{P}(\tilde{A})$  and the union bound to obtain:

$$\begin{aligned} \mathbb{P}(\tilde{A}) &\leq \sum_{k=1}^{\infty} \exp\left(-\frac{2n\epsilon_k^2}{\omega_S(\mathcal{C})^2}\right) \\ &= \sum_{k=1}^{\infty} \exp\left(-2n\left(\sqrt{\frac{\log(2/\delta)}{2n}} + \sqrt{\frac{\log(k)}{n}}\right)^2\right) \\ &< \sum_{k=1}^{\infty} \exp(-(\log(2/\delta) + 2\log(k))) \\ &= \frac{\delta}{2} \sum_{k=1}^{\infty} \frac{1}{k^2} = \frac{\delta}{2} \cdot \frac{\pi^2}{6} < \delta. \end{aligned}$$

Thus, we have completed the proof.  $\square$

#### A.2.4 Bounding the multivariate Rademacher complexity for linear classes

Here we use arguments in [17, 12] to bound  $\mathfrak{R}^n(\mathcal{H}_{\mathcal{B}})$  where

$$\mathcal{H}_{\mathcal{B}} = \{f : f(x) = Bx \text{ for some } B \in \mathbb{R}^{d \times p}, B \in \mathcal{B}\}$$

is the class of linear maps with matrix  $B$  constrained to lie in some set  $\mathcal{B}$ . The following result extends Theorem 3 of [12] to multivariate Rademacher complexity.

**Theorem 6.** *Let  $\mathcal{S}$  be a closed convex set and let  $F : \mathcal{S} \rightarrow \mathbb{R}$  be  $\alpha$ -strongly convex w.r.t.  $\|\cdot\|_*$  s.t.  $\inf_{B \in \mathcal{S}} F(B) = 0$ . Let  $X$  be such that*

$$\sup_{\sigma \in \{\pm 1\}^d} \sup_{x \in \mathcal{X}} \|\sigma x^T\| \leq X.$$

*Define  $\mathcal{B} = \{B \in \mathcal{S} : F(B) \leq \beta_*^2\}$ . Then, we have*

$$\mathfrak{R}^n(\mathcal{H}_{\mathcal{B}}) \leq X\beta_*\sqrt{\frac{2}{\alpha n}}.$$

*Proof.* Define  $\sigma_i = (\sigma_{i1}, \dots, \sigma_{id})^T$ . Then, we have

$$\begin{aligned}
\mathfrak{R}^n(\mathcal{H}_{\mathcal{B}}) &= \mathbb{E} \left[ \sup_{B \in \mathcal{B}} \frac{1}{n} \sum_{i=1}^n \sum_{j=1}^d \sigma_{ij} (Bx_i)_j \right] = \mathbb{E} \left[ \sup_{B \in \mathcal{B}} \frac{1}{n} \sum_{i=1}^n \sigma_i^T Bx_i \right] \\
&= \mathbb{E} \left[ \sup_{B \in \mathcal{B}} \frac{1}{n} \sum_{i=1}^n \text{Tr}(\sigma_i^T Bx_i) \right] = \mathbb{E} \left[ \sup_{B \in \mathcal{B}} \frac{1}{n} \sum_{i=1}^n \text{Tr}(Bx_i \sigma_i^T) \right] \\
&= \mathbb{E} \left[ \sup_{B \in \mathcal{B}} \text{Tr} \left( B \left( \frac{1}{n} \sum_{i=1}^n \sigma_i x_i^T \right)^T \right) \right] \\
&= \mathbb{E} \left[ \sup_{B \in \mathcal{B}} \langle B, \frac{1}{n} \sum_{i=1}^n \sigma_i x_i^T \rangle \right].
\end{aligned}$$

Note that the inner product between matrices  $B, A \in \mathbb{R}^{d \times p}$  is defined as

$$\langle B, A \rangle = \sum_{i,j} B_{ij} A_{ij} = \text{Tr}(BA^T)$$

Now fix  $x_1, \dots, x_n$  and note that, by our assumption, we have, for all  $i$ ,

$$\sup_{\sigma \in \{\pm 1\}^d} \|\sigma x_i^T\| \leq X.$$

Let  $\Theta$  be the random matrix  $\frac{1}{n} \sum_{i=1}^n \sigma_i x_i^T$ . Choose arbitrary  $\lambda > 0$ . By Fenchel's inequality,

$$\langle B, \lambda \Theta \rangle \leq \frac{F(B)}{\lambda} + \frac{F^*(\lambda \Theta)}{\lambda}$$

Since  $F(B) \leq \beta_*^2$  for all  $B \in \mathcal{B}$ , we have

$$\sup_{B \in \mathcal{B}} \langle B, \lambda \Theta \rangle \leq \frac{\beta_*^2}{\lambda} + \frac{F^*(\lambda \Theta)}{\lambda}$$

Taking expectations (w.r.t.  $\sigma_{ij}$ ) gives

$$\mathbb{E}[\sup_{B \in \mathcal{B}} \langle B, \lambda \Theta \rangle] \leq \frac{\beta_*^2}{\lambda} + \frac{\mathbb{E}[F^*(\lambda \Theta)]}{\lambda}$$

Now let  $Z_i = \frac{\lambda}{n} \sigma_i x_i^T$  so that  $S_n = \sum_{i=1}^n Z_i = \Theta$ . Note that  $\|Z_i\| \leq \frac{\lambda}{n} X$ . So the conditions of Lemma 4 in [12] are satisfied with  $V^2 = \lambda^2 X^2 / n$ . That lemma gives us  $\mathbb{E}[F^*(\lambda \Theta)] \leq \lambda^2 X^2 / (2\alpha n)$ . Plugging this above, we have

$$\mathbb{E}[\sup_{B \in \mathcal{B}} \langle B, \lambda \Theta \rangle] \leq \frac{\beta_*^2}{\lambda} + \frac{\lambda X^2}{2\alpha n}.$$

Setting  $\lambda = \sqrt{\frac{2\alpha n \beta_*^2}{X^2}}$  gives

$$\mathbb{E}[\sup_{B \in \mathcal{B}} \langle B, \lambda \Theta \rangle] \leq X \beta_* \sqrt{\frac{2}{\alpha n}}$$

which completes the proof.  $\square$

This theorem can be applied with many different strongly convex functions of matrices [11, Section 2.4]. We give some interesting examples below.

*Example 5 (Bounded Frobenius norm).* The most basic case is  $F(B) = \frac{1}{2} \|B\|_F^2$  which is 1-strongly convex on  $\mathbb{R}^{d \times p}$  w.r.t.  $\|\cdot\|_F$ . Note that

$$\sup_{\sigma \in \{\pm 1\}^d} \sup_{x \in \mathcal{X}} \|\sigma x^T\|_F = \sup_{\sigma \in \{\pm 1\}^d} \|\sigma\|_2 \cdot \sup_{x \in \mathcal{X}} \|x\|_2 = \sqrt{d} \sup_{x \in \mathcal{X}} \|x\|_2.$$

Therefore, if  $\frac{1}{2} \|B\|_F^2 \leq \beta_*^2$  and  $\sup_{x \in \mathcal{X}} \|x\|_2 \leq X_2$  we have

$$\mathfrak{R}^n(\mathcal{H}_{\mathcal{B}}) \leq X_2 \beta_* \sqrt{\frac{2d}{n}}.$$

*Example 6* (Bounded  $\ell_1$  norm of vectorized matrix). Another case is when  $\frac{1}{2}\|B\|_1^2 \leq \beta_*^2$  where  $\|B\|_q$  is  $\ell_q$  norm of the vectorized matrix  $B$ . We set  $F(B) = \frac{1}{2}\|B\|_q^2$  for  $q = \frac{\log(pd)}{\log(pd)-1}$  which is  $1/(3\log(pd))$ -strongly convex w.r.t.  $\|\cdot\|_1$  [11, Corollary 10]. Since  $\|B\|_q \leq \|B\|_1$ , we clearly have  $F(B) \leq \beta_*^2$ . Note that the dual norm is  $\|\cdot\|_{p'}$  for  $p' = \log(pd)$  and  $\|\Theta\|_{p'} \leq 3\|\Theta\|_\infty$  for any  $\Theta \in \mathbb{R}^{d \times p}$ . Therefore,

$$\sup_{\sigma \in \{\pm 1\}^d} \sup_{x \in \mathcal{X}} \|\sigma x^T\|_{p'} \leq 3 \sup_{\sigma \in \{\pm 1\}^d} \|\sigma\|_\infty \cdot \sup_{x \in \mathcal{X}} \|x\|_\infty = 3 \sup_{x \in \mathcal{X}} \|x\|_\infty.$$

The final conclusion is that, if  $\frac{1}{2}\|B\|_1^2 \leq \beta_*^2$  and  $\sup_{x \in \mathcal{X}} \|x\|_\infty \leq X_\infty$  we have

$$\mathfrak{R}^n(\mathcal{H}_B) \leq X_\infty \beta_* \sqrt{\frac{6 \log(pd)}{n}}.$$

*Example 7* (Bounded group-lasso norm). In case where input dimension  $p$  is large, we might want to encode prior knowledge that only a subset of the  $p$  input variables are relevant for making predictions. The vectorized  $\ell_1$  norm considered in the previous example encourages sparsity but does not result in shared sparsity structure over the rows of  $B$ . That is, it does not cause entire columns to be set to zero. In multivariate regression, the group-lasso norm [21, Section 4.3] is used to enforce such a structured form of sparsity. Define the norm

$$\|B\|_{2,q} = \left( \sum_{j=1}^p \|B_{\cdot,j}\|_2^q \right)^{1/q}.$$

The subscripts above remind us that we first take the  $\ell_2$  norms of columns  $B_{\cdot,j}$  and then take the  $\ell_q$  norm of the  $p$  resulting values. The group-lasso norm is simply  $\|\cdot\|_{2,1}$ . Let us consider the case when the matrices  $B$  are constrained to have low group-lasso norm, i.e.  $\frac{1}{2}\|B\|_{2,1}^2 \leq \beta_*^2$ . We set  $F(B) = \frac{1}{2}\|B\|_{2,q}^2$  for  $q = \frac{\log(p)}{\log(p)-1}$  which is  $1/(3\log(p))$ -strongly convex w.r.t.  $\|\cdot\|_{2,1}$  [11, Corollary 14]. Since  $\|B\|_{2,q} \leq \|B\|_{2,1}$ , we clearly have  $F(B) \leq \beta_*^2$ . Note that the dual norm is  $\|\cdot\|_{2,p'}$  for  $p' = \log(p)$  and  $\|\Theta\|_{2,p'} \leq 3\|\Theta\|_{2,\infty}$  for any  $\Theta \in \mathbb{R}^{d \times p}$ . Therefore,

$$\begin{aligned} \sup_{\sigma \in \{\pm 1\}^d} \sup_{x \in \mathcal{X}} \|\sigma x^T\|_{2,p'} &\leq 3 \sup_{\sigma \in \{\pm 1\}^d} \sup_{x \in \mathcal{X}} \|\sigma x^T\|_{2,\infty} \\ &= 3 \sup_{\sigma \in \{\pm 1\}^d} \|\sigma\|_2 \cdot \sup_{x \in \mathcal{X}} \|x\|_\infty \\ &\leq 3\sqrt{d} \sup_{x \in \mathcal{X}} \|x\|_\infty. \end{aligned}$$

The final conclusion is that, if  $\frac{1}{2}\|B\|_{2,1}^2 \leq \beta_*^2$  and  $\sup_{x \in \mathcal{X}} \|x\|_\infty \leq X_\infty$  we have

$$\mathfrak{R}^n(\mathcal{H}_B) \leq X_\infty \beta_* \sqrt{\frac{6d \log(p)}{n}}.$$
